# Supplementary material for: The dynamics of light-induced interfacial charge transfer of different dyes in dye-sensitized solar cells studied by ab initio molecular dynamics
Source: Royal Society of Chemistry journal article supplement (doi:10.1039/d1cp02412d), 2021-01-01
Supplement: d1cp02412d1.pdf [file d1cp02412d1.pdf]

## Electronic Supplementary Information

# The Dynamics of Light-Induced Interfacial Charge Transfer of Different Dyes in Dye-Sensitized Solar Cells Studied by Ab Initio Molecular Dynamics

Lanlan He<sup>‡a</sup>, Yu Guo<sup>‡a</sup> and Lars Kloo<sup>\*a</sup>

Department of Chemistry, Applied Physical Chemistry, KTH Royal Institute of Technology, Stockholm SE-10044, Sweden.

\*Corresponding author:

Email address: [larsa@kth.se](mailto:larsa@kth.se)

### The re-organization energy (optimized method)

**Table S1.** The reorganization energy of protonated and deprotonated L1-TiO<sub>2</sub>, D35-TiO<sub>2</sub> and LEG4-TiO<sub>2</sub> obtained from ADF and Gaussian 16

**Table S2.** The re-organization energies of the protonated and deprotonated L1-TiO<sub>2</sub>, D35-TiO<sub>2</sub> and LEG4-TiO<sub>2</sub> systems as well as the deprotonated L1-TiO<sub>2</sub> system with acetonitrile effect (the latter in the column of deprotonated L1-TiO<sub>2</sub>) as obtained from the statistical optimization method

**Table S3.** The average of electronic coupling for protonated and deprotonated L1-TiO<sub>2</sub>, D35-TiO<sub>2</sub> and LEG4-TiO<sub>2</sub>.

**Fig. S1(a-f)** The electronic coupling of electron transfer, hole transfer and charge recombination for the deprotonated Li1-L1-TiO<sub>2</sub> and Li2-L1-TiO<sub>2</sub> systems

### Implicit solvent effect on the interfacial geometry of the L1+TiO<sub>2</sub> model.

**Fig. S2** The molecular structure of the deprotonated L1-TiO<sub>2</sub> model system

**Fig. S3(a-d)** The distances of Ti-O1, O1-O, C-O1 and C-O2 in the 30~45 ps aiMD simulation time range with (red) and without (black) solvent effects

**Fig. S4** Angle O-Ti-O distribution of solvent and non-solvent systems for aiMD snapshots

**Fig. S5(a-b)** The dihedral angle of O-Ti-O-C and Ti-O-C-C with and without solvent effect.

### Structural analysis for aiMD with 1.0 fs time step size

**Fig. S6(a-i)** The hydrogen bonding information of protonated systems. The bond length O-H of cyanoacrylic acid of the dye, the distance of O...H, O comes from TiO<sub>2</sub> and H comes from the dye, and hydrogen bonding angle O-H...O.

**Fig. S7(a-c).** The distance between the Ti atom of TiO<sub>2</sub> and the O atom of carboxylic acid. The black lines represent protonated systems; the red lines represent deprotonated systems

**Fig. S8(a-b).** The distance between the O atom of TiO<sub>2</sub> and the O atom of cyanoacrylic acid of the protonated and deprotonated dye. The black, red and blue lines stand for L1-TiO<sub>2</sub>, D35-TiO<sub>2</sub> and LEG4-TiO<sub>2</sub> systems, respectively

**Fig. S9(a-c)** Angle O-Ti-O distributions. Black and red lines represent the protonated and deprotonated systems

**Fig. S10(a-f)** Torsion  $\Phi$  and  $\Psi$  distributions. Black and red lines represent the protonated and deprotonated systems

### The analysis of structural properties and electronic coupling and rate of electron transfer for aiMS with 0.5 fs time step size

**Fig. S11(a-c).** The electronic coupling of electron transfer, hole transfer and charge recombination for protonated L1-TiO<sub>2</sub> system.

**Fig. S12(a-g).** The structural data of protonated L1TiO<sub>2</sub> system. Ti-O bond, hydrogen bond (HB) distance H...O, O-Ti-O angle, hydrogen bonding angle H...O-H, torsion C-O-Ti-O, torsion  $\Phi$  and torsion  $\Psi$ .

**Table S4.** The data of electron coupling of charge transfer (electron transfer, hole transfer and charge recombination) and the corresponding structural data bond Ti-O, hydrogen bonding length H...O, angle O-Ti-O, hydrogen bonding angle O...H-O, torsion C-O-Ti-O,  $\Phi$  and  $\Psi$  for 20 continuous snapshots.

### The relations between scanning of Ti-O(dye) distance and charge-transfer rates

**Figure S13(a-f).** The relations of distance Ti-O and electronic coupling/rate of charge transfer.

## Input file for electronic coupling calculation

**The re-organization energy calculated by optimization method.** The formulas of optimization method<sup>27</sup> for re-organization energies calculation are shown in equation S1.

$$\lambda_e = (E_0^- - E_-) + (E_0^+ - E_0)$$

$$\lambda_h = (E_0^+ - E_+) + (E_0^+ - E_0) \quad (S1)$$

where  $\lambda_e$  and  $\lambda_h$  represent the re-organization energies of electron and hole hopping, respectively. The energy  $E_0$  stands for the energy of the neutral dye molecule which has been fully optimized geometry.  $E_0^-$  and  $E_0^+$  are the energies of the anion and cation in the optimized ground-state geometry of the neutral dye molecule, respectively.  $E_-$  and  $E_+$  refer to the energies of the relaxed geometries of the anionic and cationic states of the respective dye molecule.  $E_-$  and  $E_+$  are the energies of the neutral molecule calculated using the optimized geometries of the anionic and cationic states, respectively.

**Table S1.** The reorganization energy of protonated and deprotonated L1-TiO<sub>2</sub>, D35-TiO<sub>2</sub> and LEG4-TiO<sub>2</sub> obtained from ADF and Gaussian 16

|     |                  | Protonated systems  |                      |                       | Deprotonated systems |                      |                       |
|-----|------------------|---------------------|----------------------|-----------------------|----------------------|----------------------|-----------------------|
|     |                  | L1-TiO <sub>2</sub> | D35-TiO <sub>2</sub> | LEG4-TiO <sub>2</sub> | L1-TiO <sub>2</sub>  | D35-TiO <sub>2</sub> | LEG4-TiO <sub>2</sub> |
| ADF | $\lambda_e$ (eV) | 0.30                | 0.28                 | 0.21                  | 0.30                 | 0.27                 | 0.27                  |
|     | $\lambda_h$ (eV) | 0.45                | 0.33                 | 0.24                  | 0.21                 | 0.71                 | 0.23                  |
| G16 | $\lambda_e$ (eV) | 0.62                | 1.49                 | 0.46                  | 1.03                 | 1.00                 | 0.48                  |
|     | $\lambda_h$ (eV) | 0.28                | 0.43                 | 0.29                  | 0.78                 | 1.10                 | 0.83                  |

Table S1 gives the re-organization energy of electron and hole hopping of deprotonated and protonated L1-TiO<sub>2</sub>, D35-TiO<sub>2</sub> and LEG4-TiO<sub>2</sub> obtained from ADF software and Gaussian 16. For the protonated systems, the re-organization energies of electron hopping obtained from ADF are 0.30, 0.28 and 0.21 eV for L1-TiO<sub>2</sub>, D35-TiO<sub>2</sub> and LEG4-TiO<sub>2</sub>, respectively, and yielded by Gaussian 16 are 0.62, 1.49 and 0.46 eV, respectively. The re-organization energy of electron hopping of protonated D35TiO<sub>2</sub> system obtained from Gaussian 16 is 1.21 eV too much larger than that obtained from ADF. The re-organization energies of hole hopping obtained from ADF are 0.45, 0.33 and 0.24 eV for L1-TiO<sub>2</sub>, D35-TiO<sub>2</sub> and LEG4-TiO<sub>2</sub>, respectively, and yielded by Gaussian 16 are 0.51, 0.43 and 0.29 eV, respectively, which are in a reasonable range. For the deprotonated systems, the re-organization energies of electron hopping obtained from ADF are 0.30, 0.27 and 0.27 eV for L1-TiO<sub>2</sub>, D35-TiO<sub>2</sub> and LEG4-TiO<sub>2</sub>, respectively, and yielded by Gaussian 16 are 1.03, 1.34 and 1.35 eV, respectively. The re-organization energy of electron hopping of deprotonated systems obtained from Gaussian 16 are 0.73, 1.07 and 1.08 eV larger than those obtained from ADF, respectively. The re-organization energies of hole hopping obtained from ADF are 0.21, 0.71 and 0.23 eV for L1-TiO<sub>2</sub>, D35-TiO<sub>2</sub> and LEG4-TiO<sub>2</sub>, respectively, and yielded by Gaussian 16 are 0.78, 0.18 and 0.15 eV, respectively. The above values show the difference from ADF and Gaussian 16. Moreover, the re-organization energy obtained from Marcus-Hush method cannot reflect the changing of re-organization energy produced by different configurations. Therefore, to find out a statistical method to calculate re-organization energy is essential.

**Table S2.** The re-organization energies of the protonated and deprotonated L1-TiO<sub>2</sub>, D35-TiO<sub>2</sub> and LEG4-TiO<sub>2</sub> systems as well as the deprotonated L1-TiO<sub>2</sub> system with acetonitrile effect (the latter in the column of deprotonated L1-TiO<sub>2</sub>) as obtained from the statistical optimization method

|             |  | L1-TiO <sub>2</sub> |                  | D35-TiO <sub>2</sub> |                  | LEG4-TiO <sub>2</sub> |                  |
|-------------|--|---------------------|------------------|----------------------|------------------|-----------------------|------------------|
| unit(eV)    |  | <sup>d</sup> p      | <sup>e</sup> dep | <sup>d</sup> p       | <sup>e</sup> dep | <sup>d</sup> p        | <sup>e</sup> dep |
| $\lambda_e$ |  | 0.81                | 0.76/0.75        | 0.76                 | 0.74             | 0.81                  | 0.82             |
| $\lambda_h$ |  | 0.99                | 1.71/1.00        | 1.05                 | 1.19             | 1.01                  | 1.13             |

|                 |      |           |      |      |      |      |
|-----------------|------|-----------|------|------|------|------|
| $\lambda_{rec}$ | 1.14 | 1.02/1.11 | 1.13 | 0.86 | 1.10 | 0.86 |
|-----------------|------|-----------|------|------|------|------|

<sup>d</sup> and <sup>e</sup> represent the protonated and deprotonated systems, respectively.

Table S3 lists the average of electronic coupling when considering 95%, 5% and 100% of the data, respectively. The corresponding average of electronic coupling are listed below. Most of the data show that only 5% data are also not too sensitive to influence the average value of the total electronic coupling. These suggest that the data of electronic coupling are in the steady state.

**Table S3.** The average of electronic coupling for protonated and deprotonated L1-TiO<sub>2</sub>, D35-TiO<sub>2</sub> and LEG4-TiO<sub>2</sub>.

| Average         | <sup>d</sup> EC(eV) | L1-TiO <sub>2</sub> |              | D35-TiO <sub>2</sub> |              | LEG4-TiO <sub>2</sub> |              |
|-----------------|---------------------|---------------------|--------------|----------------------|--------------|-----------------------|--------------|
|                 |                     | protonated          | deprotonated | protonated           | deprotonated | protonated            | deprotonated |
| <sup>a</sup> et | 95%                 | 0.0575              | 0.2515       | 0.1778               | 0.1341       | 0.0633                | 0.1498       |
|                 | 5%                  | 0.0436              | 0.2921       | 0.1907               | 0.1158       | 0.0791                | 0.1078       |
|                 | 100%                | 0.0566              | 0.2555       | 0.1791               | 0.1314       | 0.0686                | 0.1455       |
| <sup>b</sup> ht | 95%                 | 0.0020              | 0.0108       | 0.0014               | 0.0067       | 0.0016                | 0.0080       |
|                 | 5%                  | 0.0016              | 0.0125       | 0.0010               | 0.0049       | 0.0019                | 0.0074       |
|                 | 100%                | 0.0019              | 0.0109       | 0.0013               | 0.0065       | 0.0017                | 0.0079       |
| <sup>c</sup> Cr | 95%                 | 0.0463              | 1.1520       | 0.0944               | 1.1437       | 0.0367                | 1.1448       |
|                 | 5%                  | 0.0371              | 0.9777       | 0.1008               | 0.6487       | 0.0619                | 1.2330       |
|                 | 100%                | 0.0454              | 1.1350       | 0.0950               | 1.0952       | 0.0400                | 1.1538       |

<sup>a</sup>, <sup>b</sup> and <sup>c</sup> represent the electron transfer, hole transfer and charge recombination, respectively. <sup>d</sup> represent the corresponding electronic coupling.

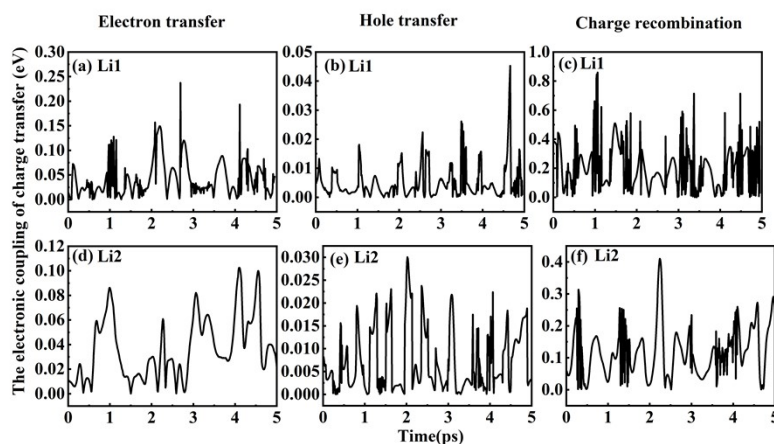

**Fig. S1(a-f)** The electronic coupling of electron transfer, hole transfer and charge recombination for the deprotonated Li1-L1-TiO<sub>2</sub> and Li2-L1-TiO<sub>2</sub> systems.

## Implicit solvent effect on the interfacial geometry of the L1+TiO<sub>2</sub> model.

In order to study the solvent effects on interfacial geometry of the dye and TiO<sub>2</sub>, the bond length, bond angle and dihedral angles of the deprotonated L1-TiO<sub>2</sub> interface model (see Figure S2) have been analyzed. The aiMD snapshots were selected from 30~45 ps in the simulations in acetonitrile solvent (PCM) and gas phase. The bond length of Ti-O1, O1-O, C-O1 and C-O2 of the deprotonated L1-TiO<sub>2</sub> system (for definitions, see Figure 1) with and without considering solvent effects are depicted in Fig. S3(a-

d), which are represented by red and black curves, respectively. The Ti-O1 distances including solvent effects are 1.81~1.90 Å; shorter than the 1.80-1.97 Å obtained in the gas phase, as shown in Fig. S3(a). This indicates that the interaction between the dye O1 and the Ti atoms gets stronger when considering solvent effects, which indicates a stronger adsorption of deprotonated L1 on the TiO<sub>2</sub> surface. This is consistent with the results of Fang et al.<sup>41</sup> Fig. S3(b) shows that the O1-O distance ranges from 3.39 ~ 3.73 Å in acetonitrile, longer than those in gas phase, 3.25~3.63 Å, which may be coupled to the polarity of acetonitrile (as modelled by PCM). Fig. S3(c) and Fig. S3(d) show the fluctuation of the dye bond length C-O1 and C-O2 when including solvent effects and not. The reason for the lengths of the distances C-O1 and C-O2 when including the effects of acetonitrile showing damped fluctuations may also be attributed to the polarity of acetonitrile. The difference between the bond lengths of C-O1 in acetonitrile and those in gas phase are quite small, ranging from 1.30~1.39 Å and 1.21~1.41 Å, respectively. However, the bond lengths of C-O2 in acetonitrile (1.17~1.26 Å) are more obviously fluctuating less than those in gas phase (1.12~1.34 Å).

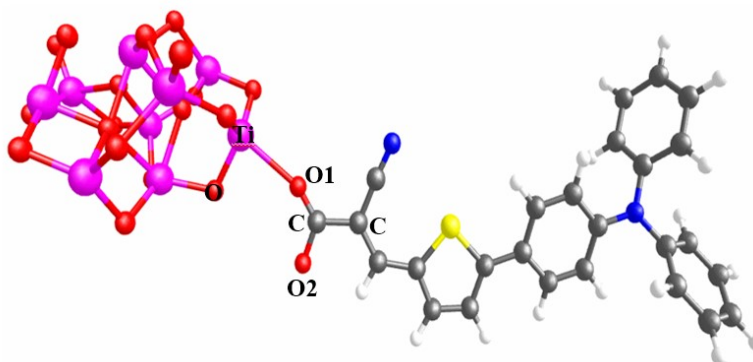

**Fig. S2** The molecular structure of the deprotonated L1-TiO<sub>2</sub> model system used in this study

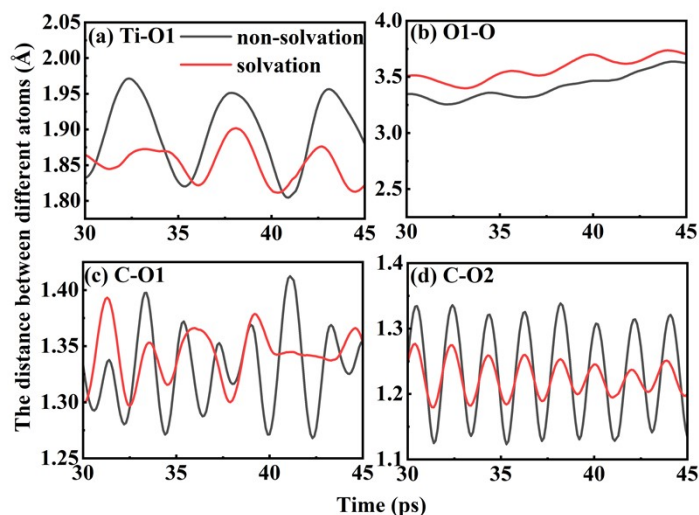

**Fig. S3(a-d).** The distances of Ti-O1, O1-O, C-O1 and C-O2 in the 30~45 ps aiMD simulation time range with (red) and without (black) solvent effects

To compare the geometrical difference with and without solvent effect, two trajectories for aiMD simulations are performed with and without considering implicit acetonitrile as solvent effect. The angle distribution of O-Ti-O and dihedral angle distribution of O-Ti-O-C and Ti-O-C-C from 30-45 ps ab initio molecular dynamic are depicted in Fig. S4 and S5(a-b). The angle O-Ti-O and dihedral angle O-Ti-O-C of deprotonated L1-TiO<sub>2</sub> system in gas phase and in implicit acetonitrile are very similar. The absolute value of dihedral angle Ti-O-C-C in gas phase and implicit acetonitrile are close to 180°. In conclusion, the implicit acetonitrile doesn't influence the geometrical properties of angle O-Ti-O and dihedral angle O-Ti-O-C/Ti-O-C-C a lot.

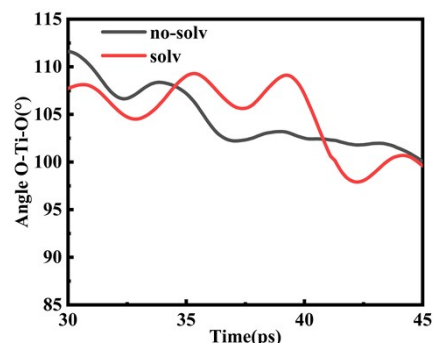

**Fig. S4** Angle O-Ti-O distribution of solvent and non-solvent systems for aiMD snapshots.

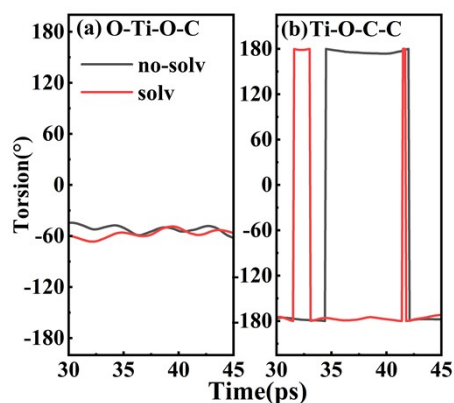

**Fig. S5(a-b)** The dihedral angle of O-Ti-O-C and Ti-O-C-C with and without solvent effect.

## Structural analysis for aiMD with 1.0 fs time step size

**Hydrogen bonding analysis.** During the aiMD simulations, all protonated and deprotonated dye stay vertically above the  $\text{TiO}_2$  cluster surface. As a consequence of the interaction between  $\text{TiO}_2$  and the dye, hydrogen bonding O-H...O forms for all the protonated systems, which is from one oxygen atom of  $\text{TiO}_2$  and the O-H of cyanoacrylic acid of the dye. The hydrogen bonding information including hydrogen bond length and hydrogen bond angle is outlined in Fig. S6(a-f), which consists of the hydrogen bonding length O...H and angle O-H...O. Fig. S6(a-b), S6(c-d) and S6(e-f) present the hydrogen bonding length of O...H and angle O-H...O for protonated L1- $\text{TiO}_2$ , D35- $\text{TiO}_2$  and LEG4- $\text{TiO}_2$  systems, respectively. The hydrogen bonding length O...H change from 1.40~1.80, 1.40~1.90 and 1.49~1.90 Å for the systems of L1- $\text{TiO}_2$ , D35- $\text{TiO}_2$  and LEG4- $\text{TiO}_2$ , respectively, which demonstrates the strong hydrogen bonding interaction. For the first 35 ps, the fluctuating range of O...H distance of D35- $\text{TiO}_2$  is from 1.40~1.90 Å which is bigger than those of L1- $\text{TiO}_2$  and LEG4- $\text{TiO}_2$  systems. However, for the 35-50 ps, the fluctuating range of O...H distance of D35- $\text{TiO}_2$  gets smaller from 1.50~1.70 Å, which suggests the growing strength of hydrogen bonding. For L1- $\text{TiO}_2$  and LEG4- $\text{TiO}_2$  systems, the fluctuating range of O...H distance are mainly from 1.55~1.70 Å and 1.50~1.65 Å, which demonstrates the stable of hydrogen bonding. The range of hydrogen bonding angle O-H...O of L1- $\text{TiO}_2$ , D35- $\text{TiO}_2$  and LEG4- $\text{TiO}_2$  systems change from 147~176, 143~169 and 146~169°, respectively, which show a large fluctuating range. For L1- $\text{TiO}_2$  system, the fluctuating center of the hydrogen bonding angle is 160° and the main fluctuating is 5° up and down the center value. For D35- $\text{TiO}_2$  system, the fluctuating center of the hydrogen bonding angle is 155° and the main fluctuating is 5° up and down the center value, which are smaller than those of L1- $\text{TiO}_2$  systems. For LEG4- $\text{TiO}_2$  system, most hydrogen bonding angle range from 157~165°, which are the biggest hydrogen bonding angle among the three systems. The hydrogen bonding length and angle analysis suggest that the hydrogen bonding strength of the LEG4- $\text{TiO}_2$  system is slightly stronger than L1- $\text{TiO}_2$  and the hydrogen bonding strength of the

D35-TiO<sub>2</sub> system is slight weaker than other two systems. We cannot find that there is any relation between the hydrogen bonding information and the rate or electronic coupling of protonated and deprotonated L1-TiO<sub>2</sub>, D35-TiO<sub>2</sub> and LEG4-TiO<sub>2</sub>.

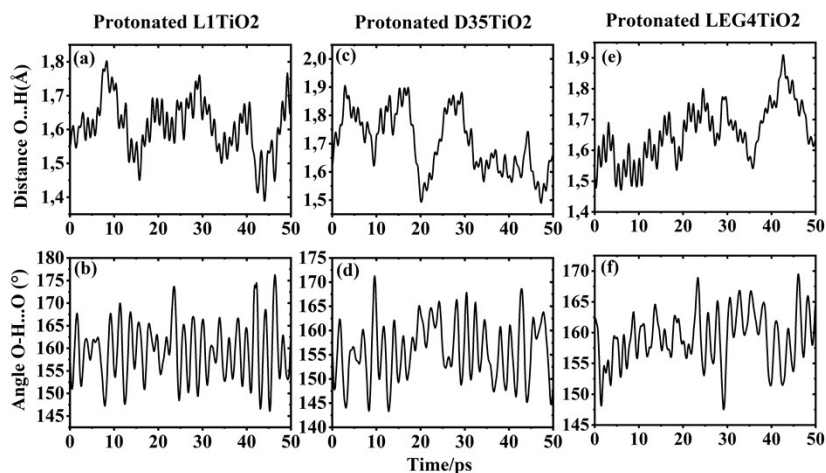

**Fig. S6(a-i)** The hydrogen bonding information of protonated systems. The bond length O-H of cyanoacrylic acid of the dye, the distance of O...H, O comes from TiO<sub>2</sub> and H comes from the dye, and hydrogen bonding angle O-H...O.

### Ti-O bond length analysis.

After optimization, one oxygen atom of cyanoacrylic acid of the dye (protonated-L1, deprotonated-L1, protonated-D35, deprotonated-D35, protonated-LEG4 and deprotonated-LEG4) connects to one Ti atom of TiO<sub>2</sub> with a bonding distance. During the process of aiMD simulation, the distances of Ti-O of all the six systems are fluctuating. In order to compare the distance of Ti-O of protonated systems and deprotonated systems directly, we outlined the corresponding protonated dye-TiO<sub>2</sub> and deprotonated dye-TiO<sub>2</sub> in Fig. 7(a-c). Fig. 7(a), S7(b) and S7(c) show the distance Ti-O of L1-TiO<sub>2</sub>, D35-TiO<sub>2</sub> and LEG4-TiO<sub>2</sub>, respectively, with the black lines representing protonated systems and the red lines representing deprotonated systems. According to Fig. S8(a-c), the Ti-O distances of protonated L1-TiO<sub>2</sub>, D35-TiO<sub>2</sub> and LEG4-TiO<sub>2</sub> systems range from 1.90~2.11, 1.90~2.05 and 1.89~2.05 Å, which are longer than those of deprotonated L1-TiO<sub>2</sub>, D35-TiO<sub>2</sub> and LEG4-TiO<sub>2</sub> systems ranging from 1.80~2.01, 1.81~1.98 and 1.81~1.96 Å. Most Ti-O distance for deprotonated are smaller than the normal Ti-O bond length (~2.0 Å).<sup>27</sup> This is due to the lack of the proton of the cyanoacrylic acid acts as an anchoring role to form hydrogen bonding with TiO<sub>2</sub> to restrict the oxygen atom of cyanoacrylic acid of the protonated dye to further approach to the Ti atom, which has been verified in hydrogen bonding analysis. It indicates that the interaction of Ti-O for deprotonated systems is stronger than those of protonated systems, which leads to the stronger electronic coupling of charge transfer of deprotonated systems. The Ti-O distance don't have any relation with the rate or electronic coupling of charge transfer for protonated and deprotonated L1-TiO<sub>2</sub>, D35-TiO<sub>2</sub> and LEG4-TiO<sub>2</sub>.

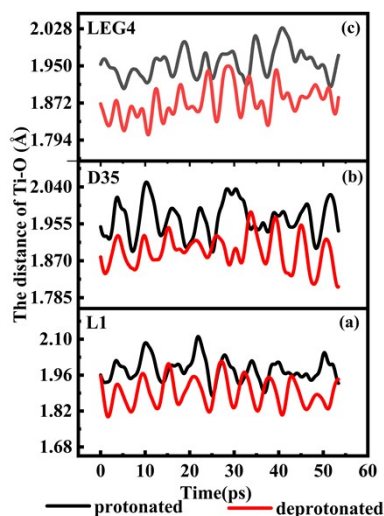

**Fig. S7(a-c).** The distance between the Ti atom of  $\text{TiO}_2$  and the O atom of carboxylic acid. The black lines represent protonated systems; the red lines represent deprotonated systems.

**O-O distance analysis.** In order to further investigate the geometrical properties of the protonated and deprotonated L1- $\text{TiO}_2$ , D35- $\text{TiO}_2$  and LEG4- $\text{TiO}_2$  systems, the distance between the oxygen atom of cyanoacrylic acid O-H of protonated dye as well as the oxygen atom of cyanoacrylic acid of deprotonated dye, which is not connecting to the Ti atom, and the oxygen atom of the semiconductor  $\text{TiO}_2$  are exhibited in Fig. S8(a-b). Fig. S8(a) and S8(b) show the O-O distance of protonated and deprotonated systems, respectively, with the black, red and blue lines representing L1- $\text{TiO}_2$ , D35- $\text{TiO}_2$  and LEG4- $\text{TiO}_2$  systems, respectively. The distances between the O atoms of  $\text{TiO}_2$  and the oxygen atoms of O-H group of cyanoacrylic acids of the protonated-L1 $\text{TiO}_2$ , D35 $\text{TiO}_2$  and LEG4 $\text{TiO}_2$  systems range from 2.52-2.82 Å, which are apparently smaller than those of deprotonated L1- $\text{TiO}_2$ , D35- $\text{TiO}_2$  and LEG4- $\text{TiO}_2$  systems. The O-O distance of deprotonated L1- $\text{TiO}_2$  system is initially close to that of the protonated systems. However, with the aiMD proceeding, the O-O distance gradually gets away from each other on account of the electrostatic repulsion. Ultimately, the O-O distance of deprotonated L1 $\text{TiO}_2$  system approach those of deprotonated D35- $\text{TiO}_2$  and LEG4- $\text{TiO}_2$  systems, which range from 3.3-3.6 Å. The O-O distance analysis of protonated and deprotonated L1- $\text{TiO}_2$ , D35- $\text{TiO}_2$  and LEG4- $\text{TiO}_2$  systems also verifies the hydrogen atom of cyanoacrylic acid of the protonated dye acting as an anchor during the configuration changing of protonated systems. We have never found any relationship between the O-O distance changing and the rate or electronic coupling of charge transfer for protonated and deprotonated L1- $\text{TiO}_2$ , D35- $\text{TiO}_2$  and LEG4- $\text{TiO}_2$ .

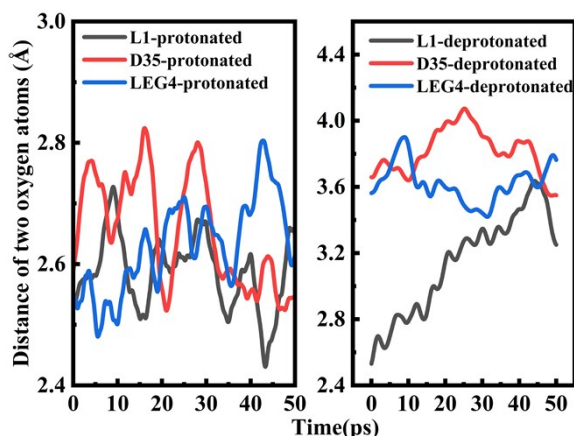

**Fig. S8(a-b).** The distance between the O atom of  $\text{TiO}_2$  and the O atom of cyanoacrylic acid of the protonated and deprotonated dye. The black, red and blue lines stand for L1- $\text{TiO}_2$ , D35- $\text{TiO}_2$  and LEG4- $\text{TiO}_2$  systems, respectively.



**Angle distribution analysis.** The O-Ti-O angle distributions for L1-TiO<sub>2</sub>, D35-TiO<sub>2</sub> and LEG4-TiO<sub>2</sub> systems are depicted in Fig. S9(a-c) with the black and red curves representing the O-Ti-O distributions of protonated and deprotonated systems, respectively. The angle O-Ti-O distributions of protonated L1-TiO<sub>2</sub>, D35-TiO<sub>2</sub> and LEG4-TiO<sub>2</sub> systems range from 83.0~93.6, 88.3~101.1 and 81.4~97.9°, respectively, which correlates well with the results (84~96°) of the first principle.<sup>27</sup> For deprotonated L1-TiO<sub>2</sub>, D35-TiO<sub>2</sub> and LEG4-TiO<sub>2</sub> systems, angle O-Ti-O distributions range from 88.9~111.6, 99.3~118.4 and 91.9~115.4°, respectively. The most striking feature of Figure 11 is that the angle O-Ti-O of deprotonated systems is bigger than those of protonated systems, which is on account of lack of the proton. It is in agreement with the analysis of hydrogen bonding, Ti-O and O-O distance. However, the angle O-Ti-O analysis don't show any relationship with the rate or electronic coupling of charge transfer for protonated and deprotonated L1-TiO<sub>2</sub>, D35-TiO<sub>2</sub> and LEG4-TiO<sub>2</sub> systems.

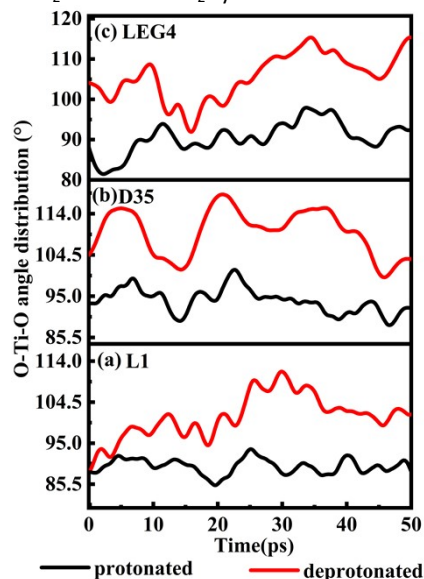

**Fig. S9(a-c)** Angle O-Ti-O distributions. Black and red lines represent the protonated and deprotonated systems

**Torsion  $\Phi$  and  $\Psi$  analysis.** To unravel whether there exists any linear relation between torsion  $\Phi/\Psi$  and the rate of electron transfer, the torsions  $\Psi$  and  $\Phi$  derived from the first 50ps aiMD simulation have been outlined in figure S10(a-f). The torsions  $\Phi$  and  $\Psi$  are stated in Figure 11, which are the torsion S-C-C-C between cyanoacrylic acid and thiophene and torsion C-C-C-C between thiophene and triphenylamine group. Fig. S10(d-f) show that the torsion  $\Phi$  of protonated L1-TiO<sub>2</sub>, D35-TiO<sub>2</sub> and LEG4-TiO<sub>2</sub> varies from 168.1~180.0, 168.6~180.0 and 164.7~179.9°, respectively, which are approach to those of deprotonated L1-TiO<sub>2</sub>, D35-TiO<sub>2</sub> and LEG4-TiO<sub>2</sub> systems 159.7~180.0, 159.6~180.0 and 164.3~180.0°, respectively. The torsion  $\Psi$  of protonated L1-TiO<sub>2</sub>, D35-TiO<sub>2</sub> and LEG4-TiO<sub>2</sub> varies from 154.9~179.9, 158.3~180.0 and 151.2~172.0°, respectively, which are approach to those of deprotonated L1-TiO<sub>2</sub>, D35-TiO<sub>2</sub> and LEG4-TiO<sub>2</sub> 142.6~175.0, 140.7~166.5 and 138.8~170.8°, respectively. The  $\Phi$  differences between protonated systems and deprotonated systems are slightly small than those of  $\Psi$ , which elucidates the hindered function of the interface interaction between dyes and TiO<sub>2</sub>. But, the relation between torsions  $\Phi/\Psi$  and the rate or electronic coupling of charge transfer of protonated and deprotonated L1-TiO<sub>2</sub>, D35-TiO<sub>2</sub> and LEG4-TiO<sub>2</sub>.

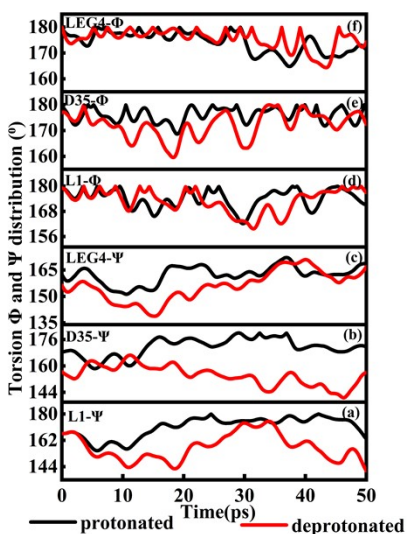

**Fig. S10(a-f)** Torsion  $\Phi$  and  $\Psi$  distributions. Black and red lines represent the protonated and deprotonated systems

### The analysis of structural properties and electronic coupling and rate of electron transfer for aiMS with 0.5 fs time step size.

Figure S11(a-c) and S12 (a-g) depict the electronic coupling of electron transfer, hole transfer and charge recombination and the structural properties Ti-O bond length, hydrogen bonding length H...O, angle O-Ti-O, hydrogen bonding angle O...H-O, torsion C-O-Ti-O,  $\Phi$  and  $\Psi$ . Comparing Fig. S12(a-c) and Fig. S13(a-g), we cannot find any relationship between electronic coupling of charge transfer and the structural properties.

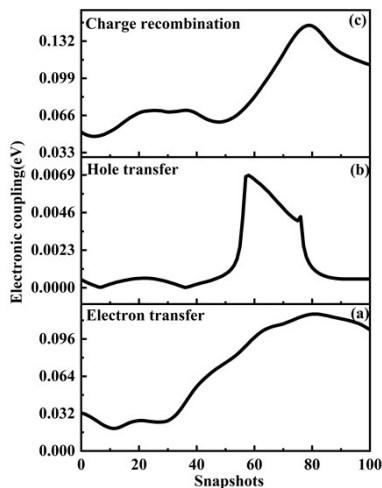

**Fig. S11(a-c).** The electronic coupling of electron transfer, hole transfer and charge recombination for protonated L1-TiO<sub>2</sub> system.

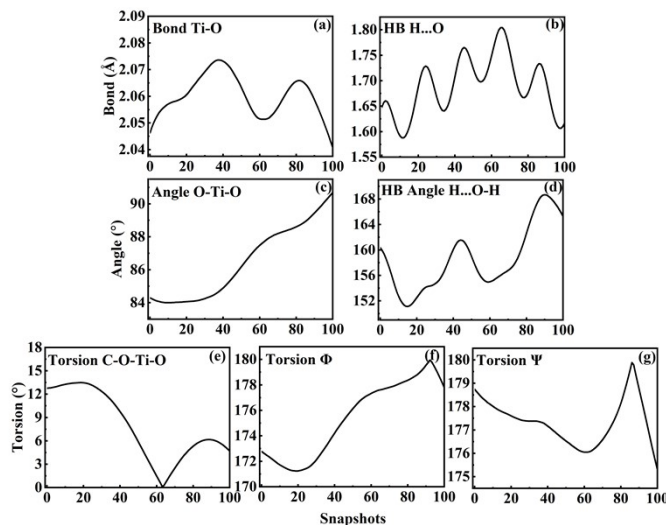

**Fig. S12(a-g).** The structural data of protonated L1TiO2 system. Ti-O bond, hydrogen bond (HB) distance H...O, O-Ti-O angle, hydrogen bonding angle H...O-H, torsion C-O-Ti-O, torsion  $\Phi$  and torsion  $\Psi$ .

**Table S4.** The data of electron coupling of charge transfer (electron transfer, hole transfer and charge recombination) and the corresponding structural data bond Ti-O, hydrogen bonding length H...O, angle O-Ti-O, hydrogen bonding angle O...H-O, torsion C-O-Ti-O,  $\Phi$  and  $\Psi$  for 20 continuous snapshots.

| snapshots | $\epsilon_{\text{et}}$ (eV) | $\epsilon_{\text{ht}}$ (eV) | $\epsilon_{\text{cr}}$ (eV) | Ti-O (Å) | H...O (Å)     | O-Ti-O (°)     | O...H-O (°) | C-O-Ti-O (°) | $\Phi$ (°) | $\Psi$ (°) |
|-----------|-----------------------------|-----------------------------|-----------------------------|----------|---------------|----------------|-------------|--------------|------------|------------|
| 1         | 0.0326                      | 0.0005                      | 0.0513                      | 2.0463   | 1.6480        | 84.2979        | 160.3355    | 12.7606      | 172.7756   | 178.7419   |
| 2         | 0.0318                      | <b>0.0041</b>               | 0.0497                      | 2.0483   | 1.6571        | 84.2372        | 159.9350    | 12.7909      | 172.6646   | 178.6485   |
| 3         | 0.0308                      | 0.0032                      | 0.0485                      | 2.0501   | <b>1.6605</b> | 84.1847        | 159.4037    | 12.8193      | 172.5660   | 178.5564   |
| 4         | 0.0295                      | 0.0024                      | 0.0478                      | 2.0516   | 1.6585        | 84.1367        | 158.7283    | 12.8620      | 172.4606   | 178.4671   |
| 5         | 0.0280                      | 0.0017                      | <b>0.04739</b>              | 2.0528   | 1.6515        | 84.0995        | 157.9599    | 12.9136      | 172.3638   | 178.3858   |
| 6         | 0.0264                      | 0.0011                      | 0.0474                      | 2.0540   | 1.6415        | 84.0707        | 157.1264    | 12.9650      | 172.2579   | 178.3147   |
| 7         | 0.0248                      | 0.0005                      | 0.0477                      | 2.0548   | 1.6298        | 84.0455        | 156.2189    | 13.0306      | 172.1484   | 178.2469   |
| 8         | 0.0232                      | 0.00001                     | 0.0483                      | 2.0555   | 1.6175        | 84.0249        | 155.2557    | 13.1010      | 172.0357   | 178.1788   |
| 9         | 0.0217                      | <b>0.0001</b>               | 0.0492                      | 2.0561   | 1.6062        | 84.0095        | 154.3166    | 13.1629      | 171.9200   | 178.1268   |
| 10        | 0.0206                      | 0.0016                      | 0.0504                      | 2.0567   | 1.5975        | 84.0014        | 153.4306    | 13.2192      | 171.8123   | 178.0676   |
| 11        | 0.0197                      | 0.0022                      | 0.0517                      | 2.0572   | 1.5912        | <b>84.0001</b> | 152.7208    | 13.2706      | 171.7201   | 178.0125   |
| 12        | <b>0.0193</b>               | 0.0027                      | 0.0532                      | 2.0575   | 1.5877        | 84.0027        | 152.1325    | 13.3167      | 171.6312   | 177.9568   |
| 13        | 0.0194                      | 0.0033                      | 0.0548                      | 2.0578   | 1.5880        | 84.0093        | 151.6768    | 13.3534      | 171.5569   | 177.9060   |
| 14        | 0.0200                      | 0.0037                      | 0.0565                      | 2.0580   | 1.5918        | 84.0121        | 151.3554    | 13.3880      | 171.4830   | 177.8630   |
| 15        | 0.0210                      | 0.0041                      | 0.0585                      | 2.0582   | 1.5989        | 84.0223        | 151.1673    | 13.4226      | 171.4146   | 177.8211   |
| 16        | 0.0222                      | 0.0045                      | 0.0604                      | 2.0584   | 1.6087        | 84.0267        | 151.1180    | 13.4448      | 171.3523   | 177.7812   |
| 17        | 0.0234                      | 0.0048                      | 0.0623                      | 2.0587   | 1.6213        | 84.0303        | 151.2131    | 13.4615      | 171.3004   | 177.7479   |

|    |        |        |        |        |        |         |          |         |          |         |
|----|--------|--------|--------|--------|--------|---------|----------|---------|----------|---------|
| 18 | 0.0244 | 0.0051 | 0.0641 | 2.0591 | 1.6363 | 84.0357 | 151.4315 | 13.4770 | 171.2697 | 177.713 |
| 19 | 0.0251 | 0.0054 | 0.0655 | 2.0594 | 1.6533 | 84.0457 | 151.7462 | 13.4921 | 171.2510 | 177.680 |
| 20 | 0.0257 | 0.0056 | 0.0669 | 2.0600 | 1.6713 | 84.0539 | 152.1206 | 13.4935 | 171.2387 | 177.642 |

<sup>a</sup> represents electronic coupling of electron transfer, <sup>b</sup> represents electronic coupling of hole transfer, <sup>c</sup> represents electronic coupling of charge recombination

In 20 snapshots, there is only one break point for electronic coupling of electron transfer. The electronic couplings of electron transfer decrease from snapshot 1 to snapshot 12, which are 0.0326, 0.0318, 0.0308, 0.0295, 0.0280, 0.0264, 0.0248, 0.0232, 0.0217, 0.0206, 0.0197 and 0.0193 eV, respectively. While the electronic couplings of electron transfer increase from snapshot 13, which are 0.1940, 0.0200, 0.0210, 0.0222, 0.0234, 0.0244, 0.0251 and 0.0257 eV, respectively. The electronic couplings of hole transfer are 0.0005, 0.0041, 0.0032, 0.0024, 0.0017, 0.0011, 0.0005, 0.00001, 0.0001, 0.0016, 0.0022, 0.0027, 0.0033, 0.0037, 0.0041, 0.0045, 0.0048, 0.0051, 0.0054 and 0.0056 eV, respectively for 20 continuous snapshots, which suggests two break points for electronic coupling of hole transfer at snapshots 2 and 9. While the electronic couplings of charge recombination decrease from snapshot 1 to snapshot 5, which are 0.0513, 0.0497, 0.0485, 0.0478 and 0.04739 eV, respectively, and increase from snapshot 6. The data of Ti-O bond length, hydrogen bonding length H...O, hydrogen bonding angle H...O-H and torsion  $\Phi$  do not have any break point for the 20 continuous snapshots. The bond length of Ti-O is ascending from 2.0463 to 2.0600 Å for the 20 continuous snapshots. The hydrogen bond length H...O increases from snapshot 1 (1.648 Å) to snapshot 3 (1.6605 Å) and decreases from snapshot 3 (1.6605 Å) to snapshot 20 1.6713 Å, which states a break point snapshot 3. The angle O-Ti-O decreases from snapshot 1 (84.2979°) to snapshot 11 (84.0001°), while increases from snapshot 11 (84.0001°) to snapshot 20 (84.0539°). However, for hydrogen bond angle O...H-O, torsion C-O-Ti-O,  $\Phi$  and  $\Psi$ , never one break point appears from the 20 continuous snapshots. The hydrogen bond angle O...H-O is descending from snapshot 1 (160.3355°) to snapshot 20 (152.1206°). Torsion C-O-Ti-O is ascending from snapshot 1 (12.7606°) to snapshot 20 (13.4939°). Torsion  $\Phi$  and  $\Psi$  are descending from snapshots 1 (172.7756) and (178.7419°) to snapshots 20 (171.2387) and (177.6423).

## The relations between scanning of Ti-O(dye) distance and charge-transfer rates

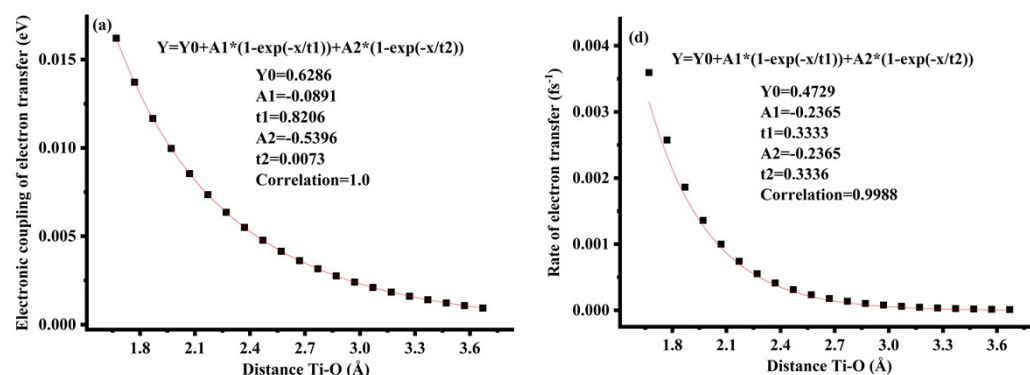

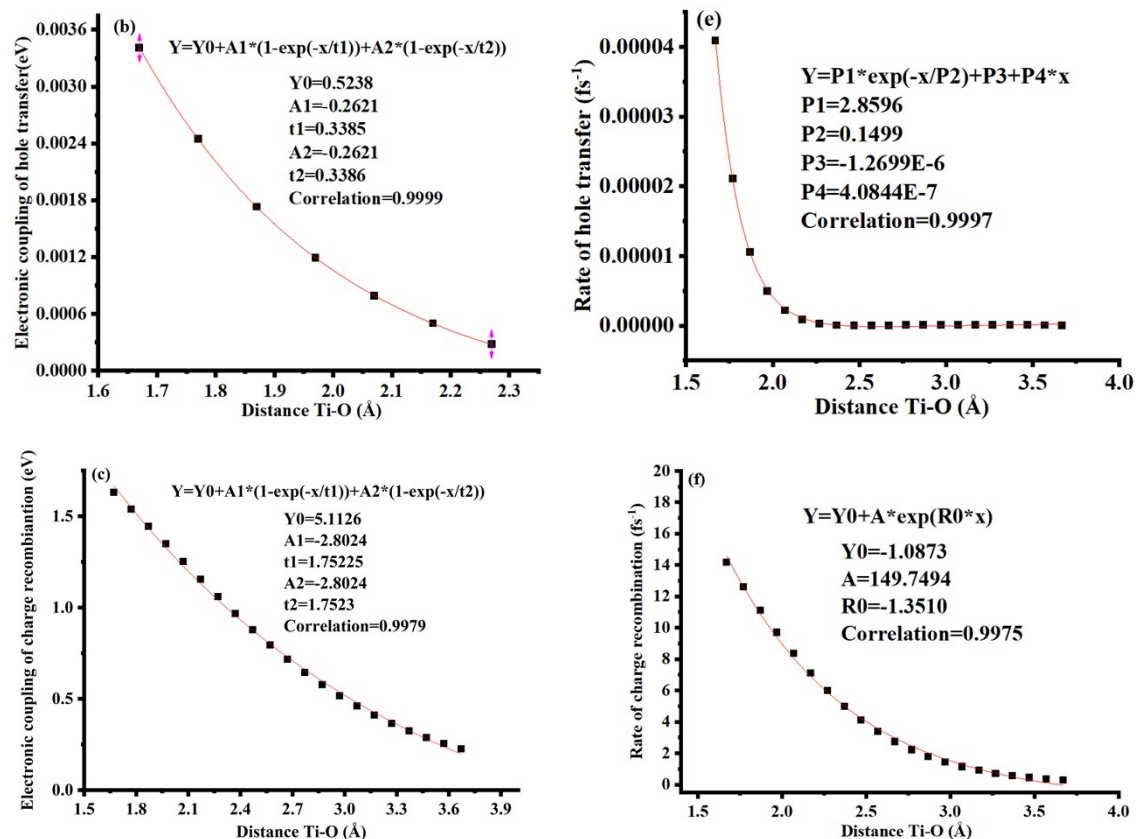

**Figure S13(a-f).** The relations of distance Ti-O and electronic coupling/rate of charge transfer.

## Input file for electronic coupling calculation

File 1

ATOMS

```

1  C  16.3302314657  1.7872762139 -3.7018509564
2  C  15.1516263429  2.4631288445 -3.4125253411
3  C  14.0915280055  1.8057398672 -2.7278226717
4  C  14.2683023845  0.4577922356 -2.3569687481
5  C  15.3751356215 -0.2473340850 -2.8004775541
6  C  16.4196467611  0.4215056770 -3.4172107385
7  H  17.0807456609  2.3067093371 -4.3638288237
8  H  15.0049893404  3.4430293646 -3.8390272213
9  H  13.4715208991  0.0432261941 -1.7687046120
10 H  15.3072818462 -1.3171853421 -2.8279796352
11 N  12.9419080927  2.5567981383 -2.2822812143
12 C  13.2003293559  3.8100817403 -1.6642938323
13 C  12.6191449267  5.0041092632 -2.0857256819
14 C  14.0190511873  3.8106360279 -0.4878254936
15 C  12.8560637446  6.1136437039 -1.4264746931
16 H  12.0336535036  5.0108647733 -2.9852676687

```

|    |   |               |               |               |
|----|---|---------------|---------------|---------------|
| 17 | C | 14.2473531184 | 4.9131151539  | 0.2831845412  |
| 18 | H | 14.3423229691 | 2.8652637972  | -0.1292543714 |
| 19 | C | 13.6041139105 | 6.1329217600  | -0.2256643341 |
| 20 | H | 12.5656286910 | 7.0070773466  | -1.9029806772 |
| 21 | H | 14.8845124946 | 4.9908500570  | 1.1413531206  |
| 22 | C | 11.6351543245 | 2.1341168631  | -2.5106264032 |
| 23 | C | 10.5112183564 | 2.6423274545  | -1.8360648406 |
| 24 | C | 11.3417878298 | 1.1079201308  | -3.4514113331 |
| 25 | C | 9.2510651946  | 2.4046315044  | -2.2521849992 |
| 26 | H | 10.7463517843 | 3.4988733385  | -1.2130702155 |
| 27 | C | 10.0498463038 | 0.7853883572  | -3.8046188476 |
| 28 | H | 12.2017497873 | 0.6280187018  | -3.9353070988 |
| 29 | C | 8.9518348605  | 1.5014976592  | -3.3113308285 |
| 30 | H | 8.3748263910  | 2.8955412378  | -1.7566628726 |
| 31 | H | 9.9982497213  | -0.1207793950 | -4.3634265411 |
| 32 | C | 7.6034362439  | 1.2249147513  | -3.7043329629 |
| 33 | C | 7.1829505432  | 0.2218198777  | -4.5358427314 |
| 34 | S | 6.1689249938  | 2.1136199675  | -2.9731661859 |
| 35 | C | 5.8032135076  | -0.0316085594 | -4.4446466253 |
| 36 | H | 7.8135798767  | -0.3518486672 | -5.1752013321 |
| 37 | C | 5.1343209322  | 0.9062074243  | -3.5990774873 |
| 38 | H | 5.3503757080  | -0.8628463691 | -4.9675535882 |
| 39 | C | 3.7223838608  | 0.8324079727  | -3.3086322469 |
| 40 | H | 3.3098034469  | -0.1794763746 | -3.4809839693 |
| 41 | C | 2.9705361670  | 1.6959213423  | -2.5833453649 |
| 42 | C | 3.4626956297  | 2.9685521935  | -2.1560706201 |
| 43 | N | 3.9806592533  | 3.9930631575  | -1.8731133609 |
| 44 | C | 1.6042701799  | 1.3796687906  | -2.1529423186 |
| 45 | O | 0.9190942028  | 2.0000426280  | -1.3004385461 |
| 46 | O | 1.1352922747  | 0.3479770539  | -2.8278192325 |
| 47 | H | 0.1554998238  | 0.2331206924  | -2.5264320299 |
| 48 | H | 17.2627590633 | -0.1397518637 | -3.9038974808 |
| 49 | H | 13.4993691412 | 7.0055024471  | 0.4103531965  |

END

CHARGE 0.0 0.0

BASIS

type TZ2P

core None

createoutput None

END

NUMERICALQUALITY GOOD

RELATIVISTIC SCALAR ZORA MAPA

XC

GGA PW91

DISPERSION GRIMME4 s6=1.0 s8=0.7728 a1=0.3958 a2=4.9341

END

File 2

ATOMS

|   |    |               |               |               |
|---|----|---------------|---------------|---------------|
| 1 | Ti | -0.9827897798 | 1.9307593980  | -0.5073315145 |
| 2 | O  | -3.0537724498 | 2.1665031148  | -0.8761333498 |
| 3 | O  | -1.3269176706 | 0.6132069963  | -1.7548143608 |
| 4 | O  | -1.0223636892 | 1.1489507692  | 1.0423834941  |
| 5 | Ti | -2.3903701714 | 0.4100043896  | 2.1937600227  |
| 6 | O  | -1.7126819309 | 0.0555054423  | 3.5972202804  |
| 7 | O  | -3.2873733077 | -1.1310651272 | 1.4286254619  |
| 8 | O  | -3.7955055816 | 1.6250057559  | 1.9556172781  |

9 Ti -4.7801013827 2.1449338596 0.6329145191  
 10 O -3.7162551824 4.4865047668 -2.3521169252  
 11 Ti -2.9991813199 4.0828027185 -0.7716808457  
 12 O -1.2323145086 3.7914365296 -0.4724516582  
 13 O -4.2853759772 3.9533782357 0.5418211671  
 14 O -5.7060730104 2.7030920330 -1.3407994576  
 15 Ti -3.1420574288 0.4280152027 -1.8995666556  
 16 O -3.9338724031 1.2701048409 -3.2078791999  
 17 O -4.6954821358 0.3820738918 -0.4602909168  
 18 O -3.4174989678 -1.3514646041 -1.5303670418  
 19 Ti -4.3075386779 -1.4348395854 0.0384795999  
 20 O -6.5104272439 1.4636304254 1.0329139758  
 21 O -6.1255633900 -1.6052818267 0.1065069418  
 22 Ti -6.6258660320 0.1633769528 -0.2009442083  
 23 Ti -4.7967952910 2.9528576180 -2.8368939978  
 24 O -8.7398106468 3.4035393661 -1.8366138962  
 25 Ti -7.4383857116 2.5258929247 -2.1601991885  
 26 O -6.3906070298 3.0499708931 -3.6473121927  
 27 O -7.5277355585 0.6092599535 -1.6533080651  
 END

BASIS

type TZ2P

core None

createoutput None

END

NUMERICALQUALITY GOOD

RELATIVISTIC SCALAR ZORA MAPA

XC

GGA PW91

DISPERSION GRIMME4 s6=1.0 s8=0.7728 a1=0.3958 a2=4.9341

END

File 3

ATOMS

1 C 16.3302314657 1.7872762139 -3.7018509564 f=Region\_1 b=Region\_1  
 2 C 15.1516263429 2.4631288445 -3.4125253411 f=Region\_1 b=Region\_1  
 3 C 14.0915280055 1.8057398672 -2.7278226717 f=Region\_1 b=Region\_1  
 4 C 14.2683023845 0.4577922356 -2.3569687481 f=Region\_1 b=Region\_1  
 5 C 15.3751356215 -0.2473340850 -2.8004775541 f=Region\_1 b=Region\_1  
 6 C 16.4196467611 0.4215056770 -3.4172107385 f=Region\_1 b=Region\_1  
 7 H 17.0807456609 2.3067093371 -4.3638288237 f=Region\_1 b=Region\_1  
 8 H 15.0049893404 3.4430293646 -3.8390272213 f=Region\_1 b=Region\_1  
 9 H 13.4715208991 0.0432261941 -1.7687046120 f=Region\_1 b=Region\_1  
 10 H 15.3072818462 -1.3171853421 -2.8279796352 f=Region\_1 b=Region\_1  
 11 N 12.9419080927 2.5567981383 -2.2822812143 f=Region\_1 b=Region\_1  
 12 C 13.2003293559 3.8100817403 -1.6642938323 f=Region\_1 b=Region\_1  
 13 C 12.6191449267 5.0041092632 -2.0857256819 f=Region\_1 b=Region\_1  
 14 C 14.0190511873 3.8106360279 -0.4878254936 f=Region\_1 b=Region\_1  
 15 C 12.8560637446 6.1136437039 -1.4264746931 f=Region\_1 b=Region\_1  
 16 H 12.0336535036 5.0108647733 -2.9852676687 f=Region\_1 b=Region\_1  
 17 C 14.2473531184 4.9131151539 0.2831845412 f=Region\_1 b=Region\_1  
 18 H 14.3423229691 2.8652637972 -0.1292543714 f=Region\_1 b=Region\_1  
 19 C 13.6041139105 6.1329217600 -0.2256643341 f=Region\_1 b=Region\_1  
 20 H 12.5656286910 7.0070773466 -1.9029806772 f=Region\_1 b=Region\_1  
 21 H 14.8845124946 4.9908500570 1.1413531206 f=Region\_1 b=Region\_1  
 22 C 11.6351543245 2.1341168631 -2.5106264032 f=Region\_1 b=Region\_1  
 23 C 10.5112183564 2.6423274545 -1.8360648406 f=Region\_1 b=Region\_1

24 C 11.3417878298 1.1079201308 -3.4514113331 f=Region\_1 b=Region\_1  
 25 C 9.2510651946 2.4046315044 -2.2521849992 f=Region\_1 b=Region\_1  
 26 H 10.7463517843 3.4988733385 -1.2130702155 f=Region\_1 b=Region\_1  
 27 C 10.0498463038 0.7853883572 -3.8046188476 f=Region\_1 b=Region\_1  
 28 H 12.2017497873 0.6280187018 -3.9353070988 f=Region\_1 b=Region\_1  
 29 C 8.9518348605 1.5014976592 -3.3113308285 f=Region\_1 b=Region\_1  
 30 H 8.3748263910 2.8955412378 -1.7566628726 f=Region\_1 b=Region\_1  
 31 H 9.9982497213 -0.1207793950 -4.3634265411 f=Region\_1 b=Region\_1  
 32 C 7.6034362439 1.2249147513 -3.7043329629 f=Region\_1 b=Region\_1  
 33 C 7.1829505432 0.2218198777 -4.5358427314 f=Region\_1 b=Region\_1  
 34 S 6.1689249938 2.1136199675 -2.9731661859 f=Region\_1 b=Region\_1  
 35 C 5.8032135076 -0.0316085594 -4.4446466253 f=Region\_1 b=Region\_1  
 36 H 7.8135798767 -0.3518486672 -5.1752013321 f=Region\_1 b=Region\_1  
 37 C 5.1343209322 0.9062074243 -3.5990774873 f=Region\_1 b=Region\_1  
 38 H 5.3503757080 -0.8628463691 -4.9675535882 f=Region\_1 b=Region\_1  
 39 C 3.7223838608 0.8324079727 -3.3086322469 f=Region\_1 b=Region\_1  
 40 H 3.3098034469 -0.1794763746 -3.4809839693 f=Region\_1 b=Region\_1  
 41 C 2.9705361670 1.6959213423 -2.5833453649 f=Region\_1 b=Region\_1  
 42 C 3.4626956297 2.9685521935 -2.1560706201 f=Region\_1 b=Region\_1  
 43 N 3.9806592533 3.9930631575 -1.8731133609 f=Region\_1 b=Region\_1  
 44 C 1.6042701799 1.3796687906 -2.1529423186 f=Region\_1 b=Region\_1  
 45 O 0.9190942028 2.0000426280 -1.3004385461 f=Region\_1 b=Region\_1  
 46 O 1.1352922747 0.3479770539 -2.8278192325 f=Region\_1 b=Region\_1  
 47 H 0.1554998238 0.2331206924 -2.5264320299 f=Region\_1 b=Region\_1  
 48 H 17.2627590633 -0.1397518637 -3.9038974808 f=Region\_1 b=Region\_1  
 49 H 13.4993691412 7.0055024471 0.4103531965 f=Region\_1 b=Region\_1  
 50 Ti -0.9827897798 1.9307593980 -0.5073315145 f=Region\_2 b=Region\_2  
 51 O -3.0537724498 2.1665031148 -0.8761333498 f=Region\_2 b=Region\_2  
 52 O -1.3269176706 0.6132069963 -1.7548143608 f=Region\_2 b=Region\_2  
 53 O -1.0223636892 1.1489507692 1.0423834941 f=Region\_2 b=Region\_2  
 54 Ti -2.3903701714 0.4100043896 2.1937600227 f=Region\_2 b=Region\_2  
 55 O -1.7126819309 0.0555054423 3.5972202804 f=Region\_2 b=Region\_2  
 56 O -3.2873733077 -1.1310651272 1.4286254619 f=Region\_2 b=Region\_2  
 57 O -3.7955055816 1.6250057559 1.9556172781 f=Region\_2 b=Region\_2  
 58 Ti -4.7801013827 2.1449338596 0.6329145191 f=Region\_2 b=Region\_2  
 59 O -3.7162551824 4.4865047668 -2.3521169252 f=Region\_2 b=Region\_2  
 60 Ti -2.9991813199 4.0828027185 -0.7716808457 f=Region\_2 b=Region\_2  
 61 O -1.2323145086 3.7914365296 -0.4724516582 f=Region\_2 b=Region\_2  
 62 O -4.2853759772 3.9533782357 0.5418211671 f=Region\_2 b=Region\_2  
 63 O -5.7060730104 2.7030920330 1.3407994576 f=Region\_2 b=Region\_2  
 64 Ti -3.1420574288 0.4280152027 -1.8995666556 f=Region\_2 b=Region\_2  
 65 O -3.9338724031 1.2701048409 -3.2078791999 f=Region\_2 b=Region\_2  
 66 O -4.6954821358 0.3820738918 -0.4602909168 f=Region\_2 b=Region\_2  
 67 O -3.4174989678 -1.3514646041 -1.5303670418 f=Region\_2 b=Region\_2  
 68 Ti -4.3075386779 -1.4348395854 0.0384795999 f=Region\_2 b=Region\_2  
 69 O -6.5104272439 1.4636304254 1.0329139758 f=Region\_2 b=Region\_2  
 70 O -6.1255633900 -1.6052818267 0.1065069418 f=Region\_2 b=Region\_2  
 71 Ti -6.6258660320 0.1633769528 -0.2009442083 f=Region\_2 b=Region\_2  
 72 Ti -4.7967952910 2.9528576180 -2.8368939978 f=Region\_2 b=Region\_2  
 73 O -8.7398106468 3.4035393661 -1.8366138962 f=Region\_2 b=Region\_2  
 74 Ti -7.4383857116 2.5258929247 -2.1601991885 f=Region\_2 b=Region\_2  
 75 O -6.3906070298 3.0499708931 -3.6473121927 f=Region\_2 b=Region\_2  
 76 O -7.5277355585 0.6092599535 -1.6533080651 f=Region\_2 b=Region\_2  
 END

CHARGE 0.0 0.0  
 BASIS  
 type TZ2P



core None  
createoutput None  
END  
XC  
GGA PW91  
END  
NUMERICALQUALITY GOOD  
RELATIVISTIC SCALAR ZORA MAPA  
SYMMETRY NOSYM  
TRANSFERINTEGRALS  
Fragments  
Region\_1 T1.T21  
Region\_2 T2.T21  
DISPERSION GRIMME4 s6=1.0 s8=0.7728 a1=0.3958 a2=4.9341  
END
